# Supplementary material for: Synthesis, structure and magnetic characterization of dinuclear copper(ii) complexes bridged by bicompartmental phenolate
Source: Royal Society of Chemistry journal article supplement (doi:10.1039/c5ra19358c), 2015-01-01
Supplement: c5ra19358c1.pdf [file c5ra19358c1.pdf]

## SUPPLEMENTARY MATERIAL

### Synthesis, structure and magnetic characterization of dinuclear copper(II) complexes bridged by bicompartamental phenolate

**Salah S. Massoud,<sup>\*a</sup> Thomas Junk,<sup>a</sup> Febee R. Louka,<sup>a</sup> Radovan Herchel,<sup>b</sup> Zdeněk Trávníček,<sup>\*b</sup> Roland C. Fischer,<sup>c</sup> Franz A. Mautner,<sup>\*d</sup>**

*<sup>a</sup>Department of Chemistry, University of Louisiana at Lafayette, Lafayette, LA 70504, U. S. A.*

*<sup>b</sup>Department of Inorganic Chemistry & Regional Centre of Advanced Technologies and Materials, Faculty of Science, Palacký University, 17. listopadu 12, CZ-77146 Olomouc, Czech Republic*

*<sup>c</sup>Institut für Anorganische Chemische, Technische Universität Graz, Stremayrgasse 9/V, A-8010 Graz, Austria*

*<sup>d</sup>Institut für Physikalische and Theoretische Chemie, Technische Universität Graz, Stremayrgasse 9/II, A-8010, Graz, Austria*

ESI  
-19255 ✓

#2700

✓

Sample Name: -1  
Inj Vol: 19255\_150v\_0.1ul.d  
Data Filename: 19255\_150v\_0.1ul.d  
Position: InjPosition  
ACQ Method  
PI-DI  
Instrument Name: Sample  
SampleType  
Comment  
User Name: IRM Calibration Status  
Acquired Time: 4/14/2014 3:46:39 PM  
Success

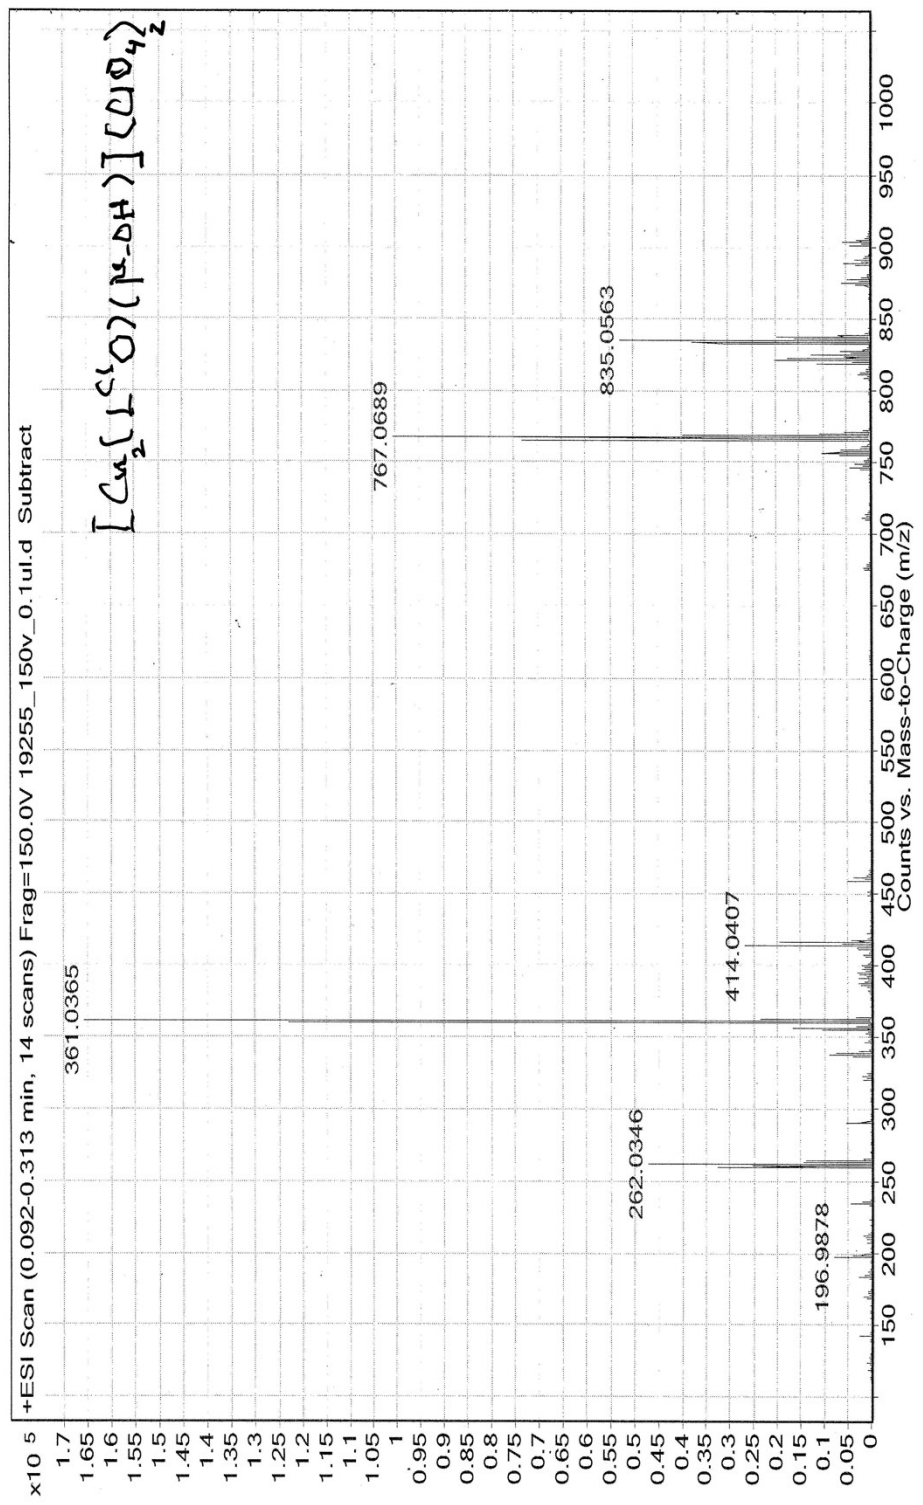

Fig. S1. ESI Mass spectrum of  $[Cu_2(\mu-L^{ClO})(\mu-OH)](ClO_4)_2$  (1) in acetonitrile solution

EST  
# 21375

POS

#2666

|               |                    |             |       |                 |              |                        |                       |
|---------------|--------------------|-------------|-------|-----------------|--------------|------------------------|-----------------------|
| Sample Name   | -1                 | Position    | P1-B9 | Instrument Name | Instrument 1 | User Name              | Success               |
| Inj Vol       | 21375_150v_0.1ul.d | InjPosition |       | SampleType      | Sample       | IRM Calibration Status | 10/15/2014 1:05:52 PM |
| Data Filename | 21375_150v_0.1ul.d | ACQ Method  |       | Comment         |              | Acquired Time          |                       |

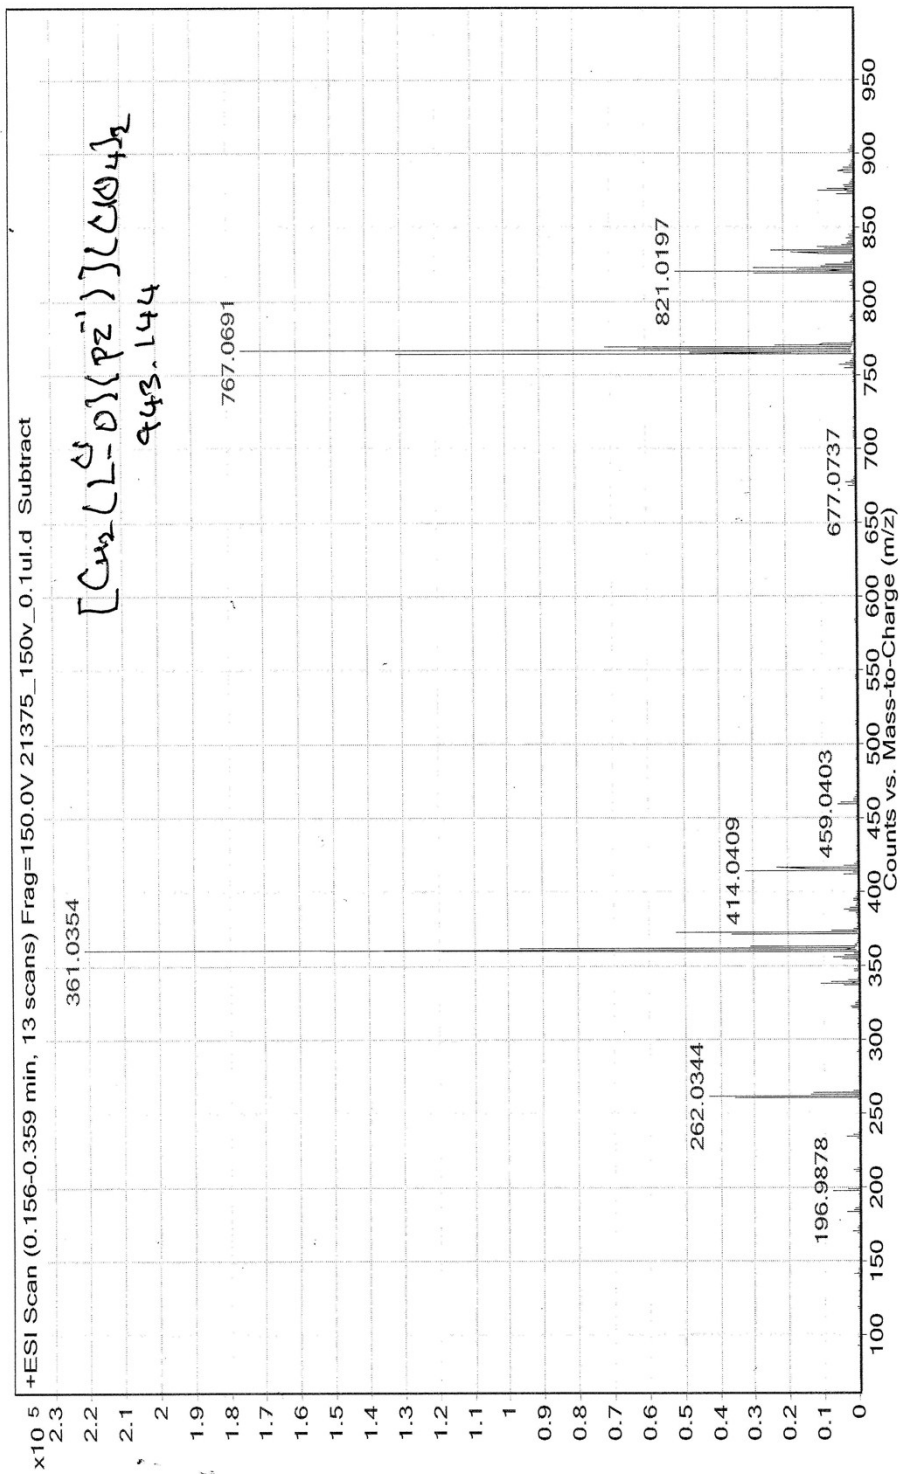

Fig. S2. ESI Mass spectrum of  $[Cu_2(\mu-L^{ClO})(\mu-C_3H_3N_2^-)](ClO_4)_2$  (**2**) in acetonitrile solution

881  
# 21376

#2746

pu

Sample Name: -1  
Inj Vol: 21376\_150v\_0.1ul.d  
Data Filename: 21376\_150v\_0.1ul.d  
Position: InjPosition  
ACQ Method:  
PI-CI:  
Instrument Name: Instrument 1  
Sample:  
SampleType:  
Comment:  
User Name:  
IRM Calibration Status:  
Acquired Time:  
All Ions Missed:  
10/15/2014 4:26:47 PM

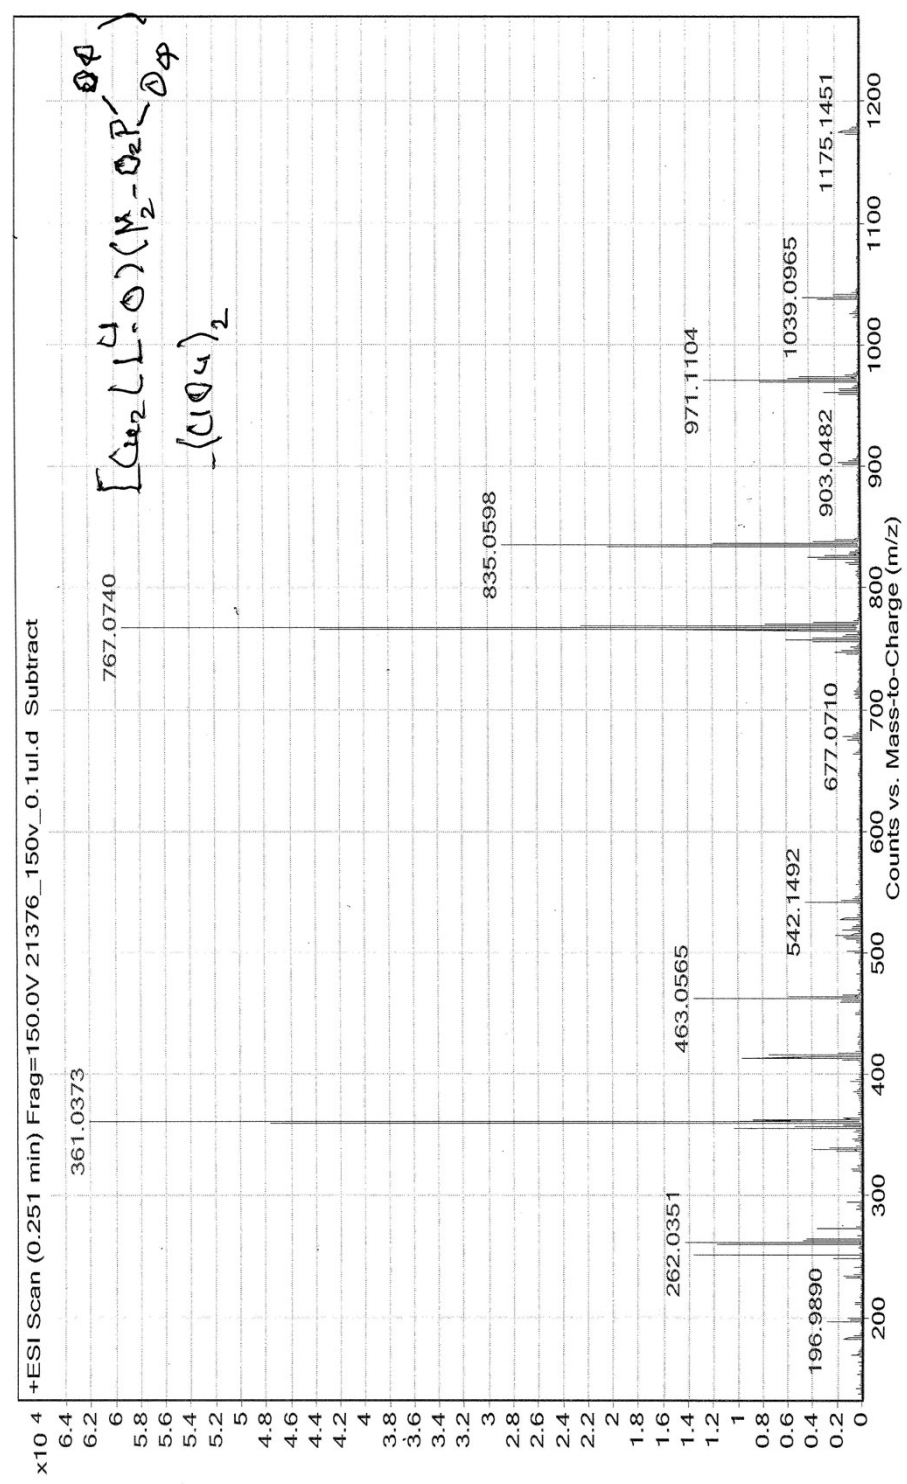

Fig. S3. ESI Mass spectrum of  $[Cu_2(L^{Cl-O})(\mu-O_2P(OC_6H_5)_2)(ClO_4)_2]$  (**3**) in acetonitrile solution

ESV  
# 2724

green soln  
L-O/dca/Cu<sup>2+</sup>/PF<sub>6</sub><sup>-</sup> # 21482

New

Sample Name: -1  
Inj Vol: 21482\_150v\_0.1ul.d  
Data Filename: 21482\_150v\_0.1ul.d  
Position: P1-A5  
Inj Position: ACQ Method  
Instrument Name: Instrument 1  
Sample Type: Sample  
Comment:  
User Name: Success  
IRM Calibration Status: Success  
Acquired Time: 12/15/2014 1:31:39 PM

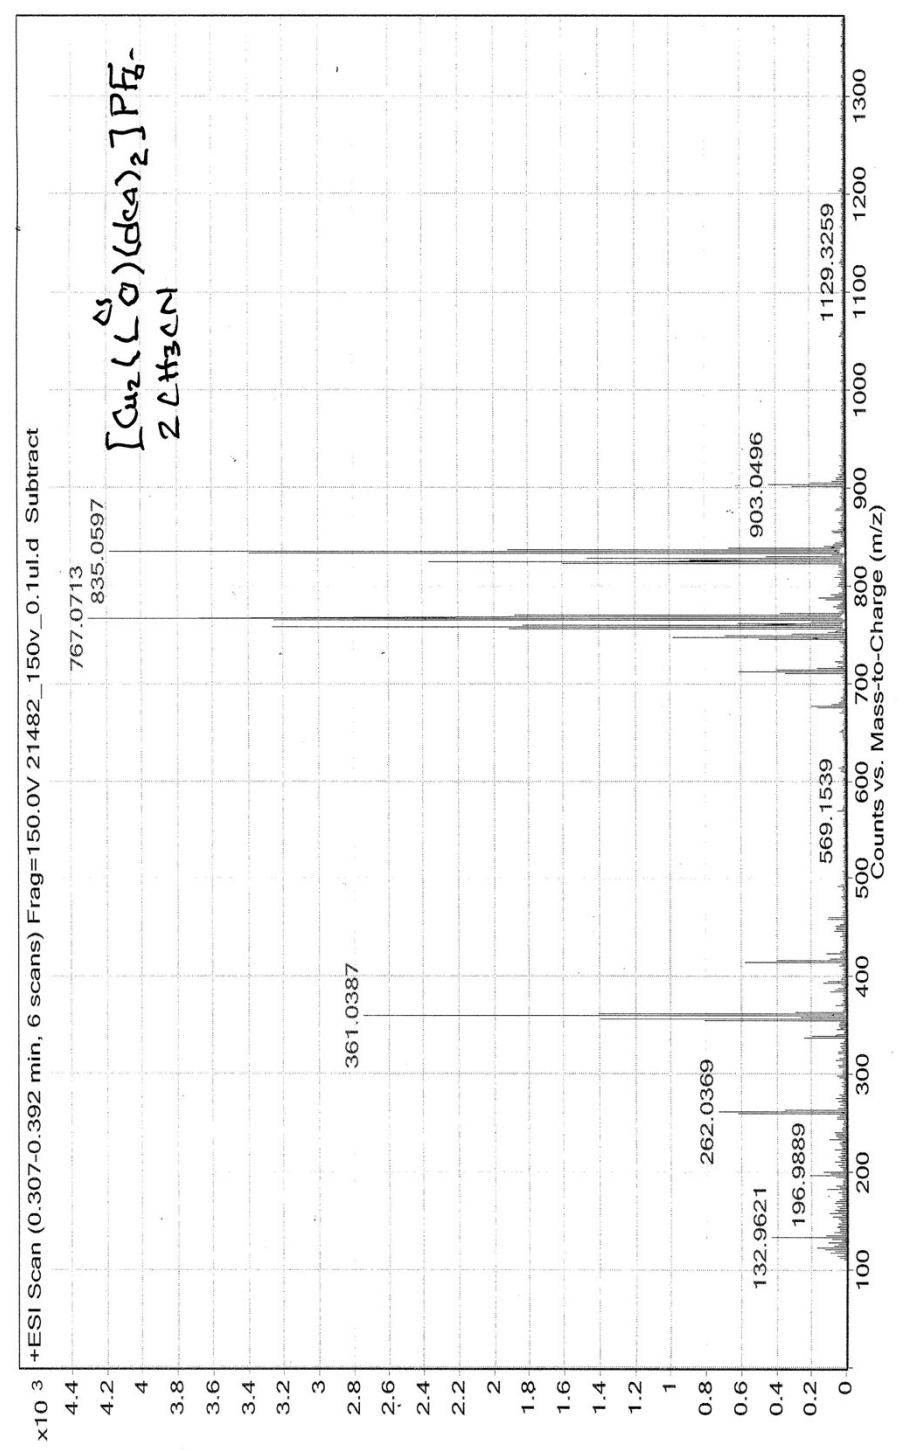

Fig. S4. ESI Mass spectrum of  $[Cu_2(\mu-L^{ClO})(dca)_2]PF_6 \cdot 2CH_3CN$  (4·2CH<sub>3</sub>CN) in acetonitrile solution

# 2648  
 # 21485  
 ESI  
 [Cu<sub>2</sub>(μ-L<sup>Me</sup>O)(dca)]PF<sub>6</sub>  
 New  
 Instrument Name: P1-A8  
 Position: Inj Position  
 Inj Vol: -1  
 Data Filename: 21485\_150v\_0.1ul.d  
 ACQ Method  
 Instrument 1: Sample  
 User Name: IRM Calibration Status  
 Acquired Time: 12/15/2014 2:11:58 PM  
 SUCCESS

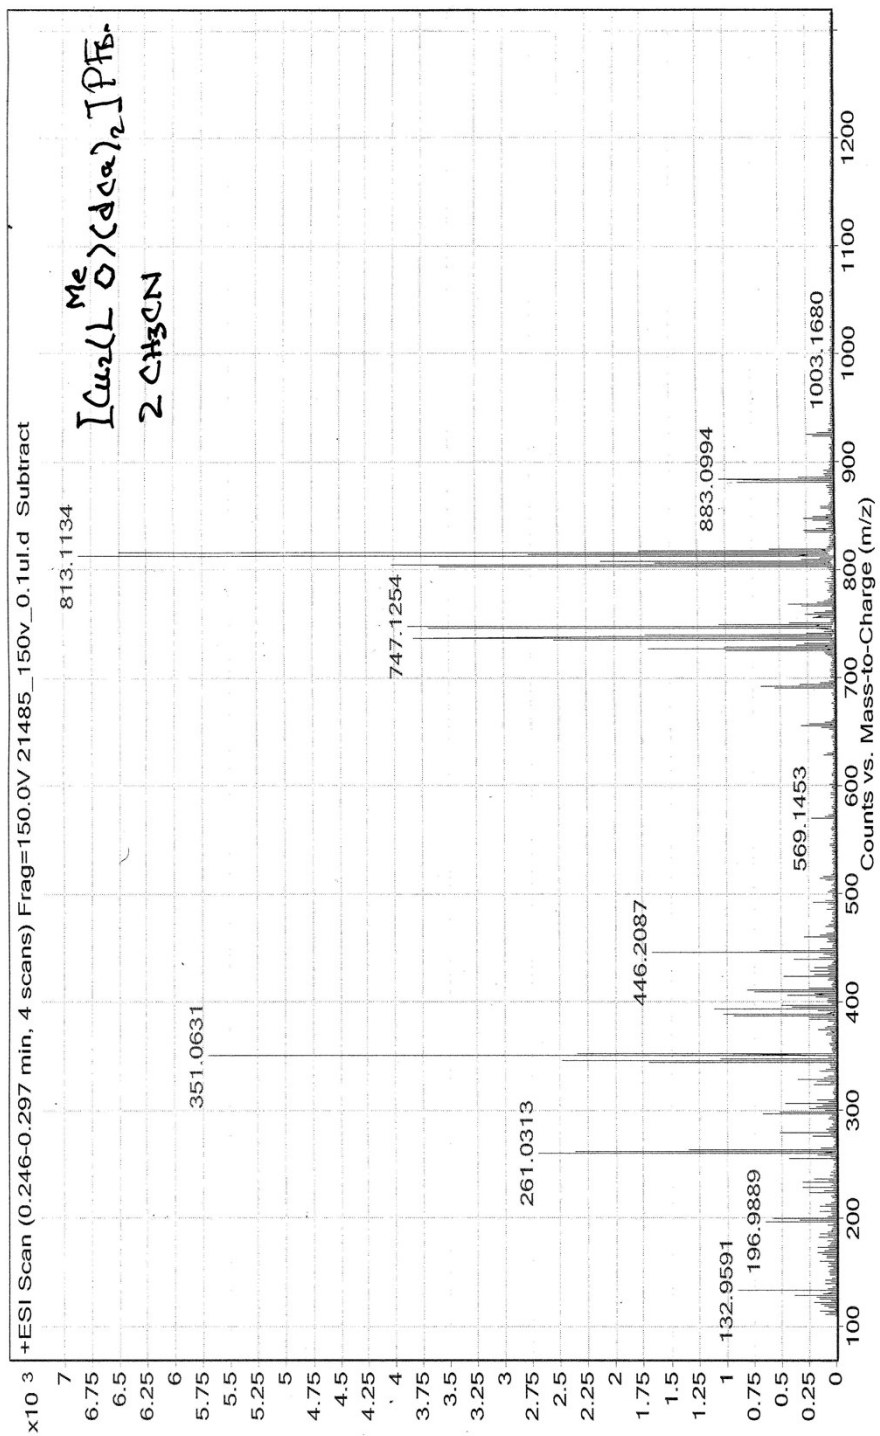

**Fig. S5.** ESI Mass spectrum of  $[Cu_2(\mu-L^{Me}O)(dca)_2]PF_6 \cdot 2CH_3CN$  (5·2CH<sub>3</sub>CN) in acetonitrile solution

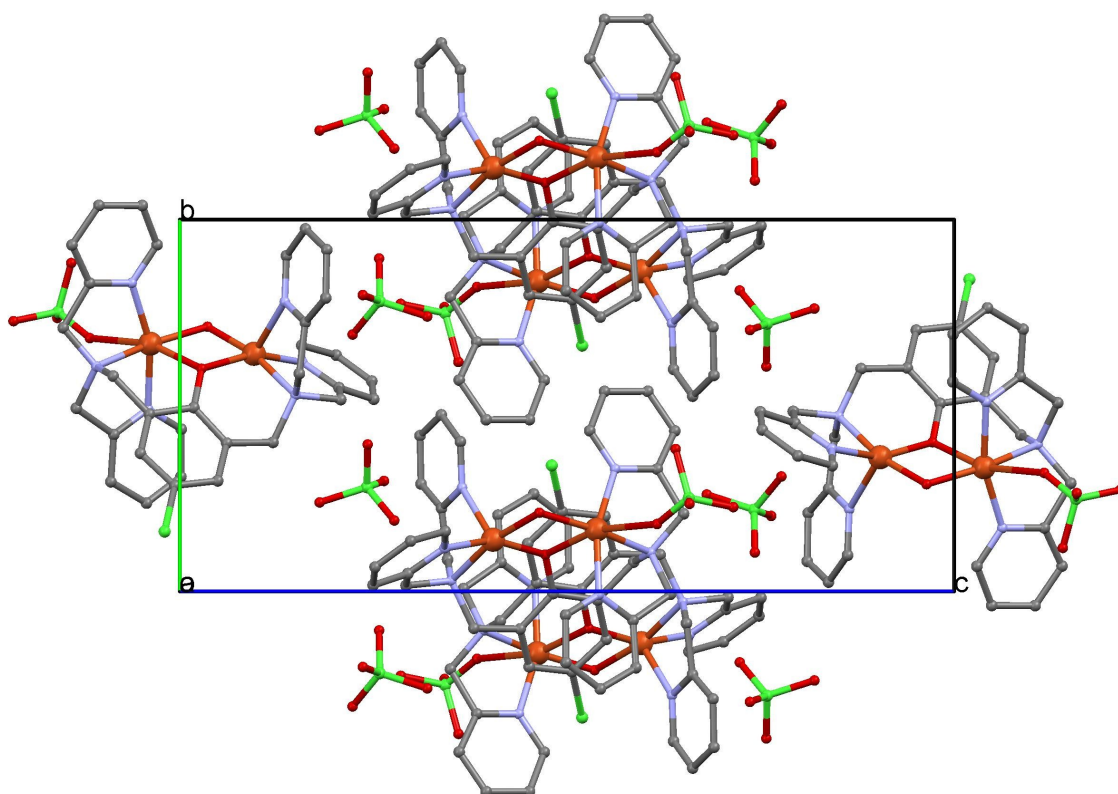

**Fig. S6.** Packing plot of 1

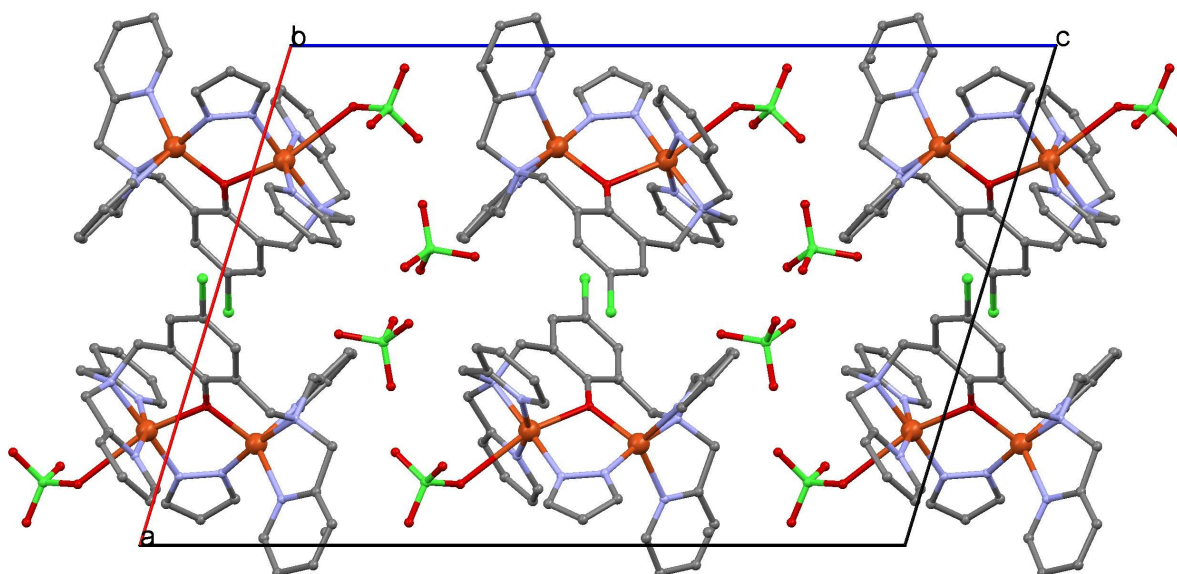

**Fig. S7.** Packing plot of 2

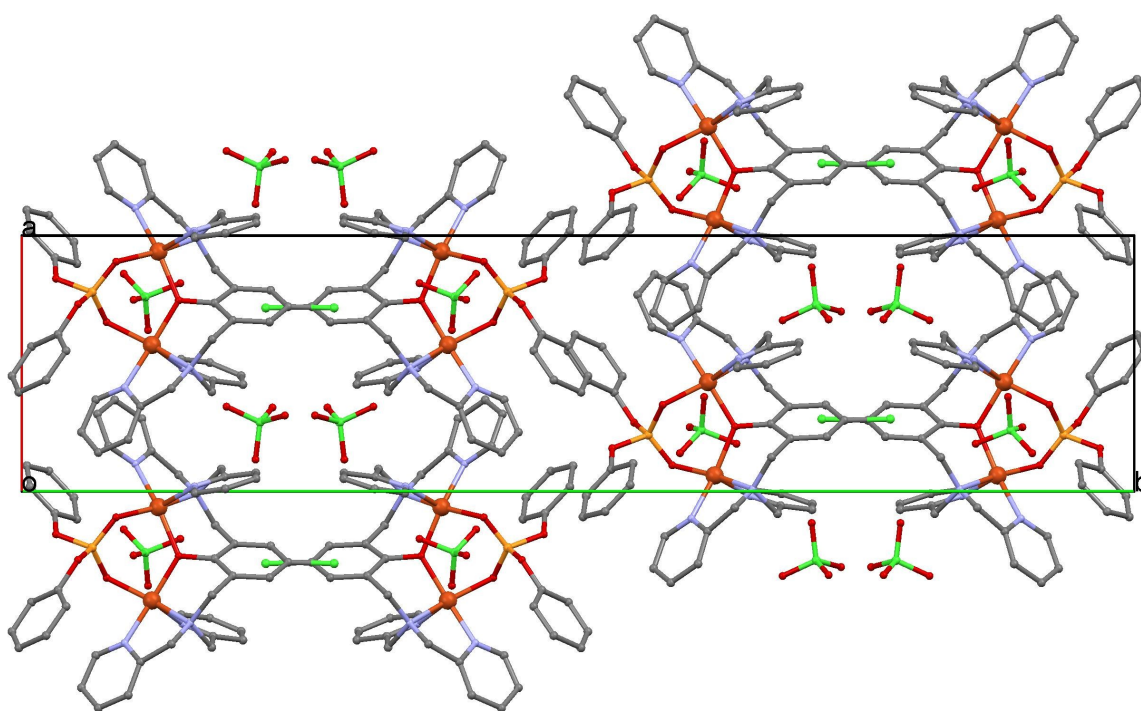

**Fig. S8.** Packing plot of **3**

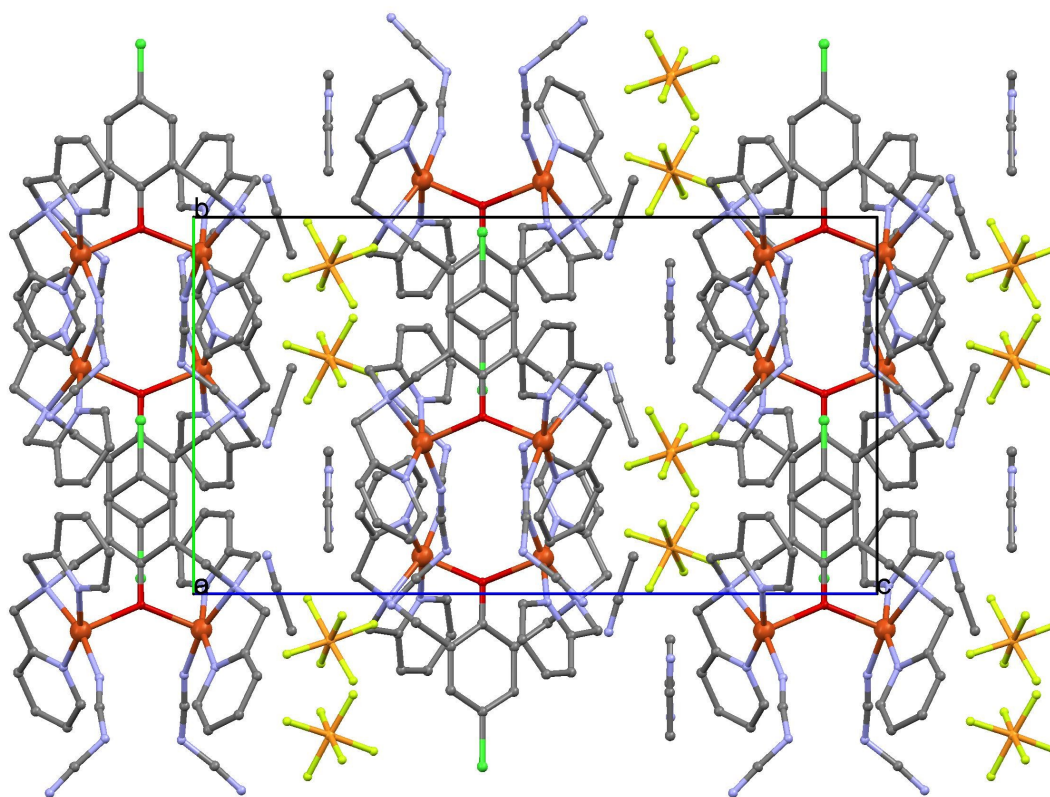

**Fig. S9.** Packing plot of **4·2CH<sub>3</sub>CN**



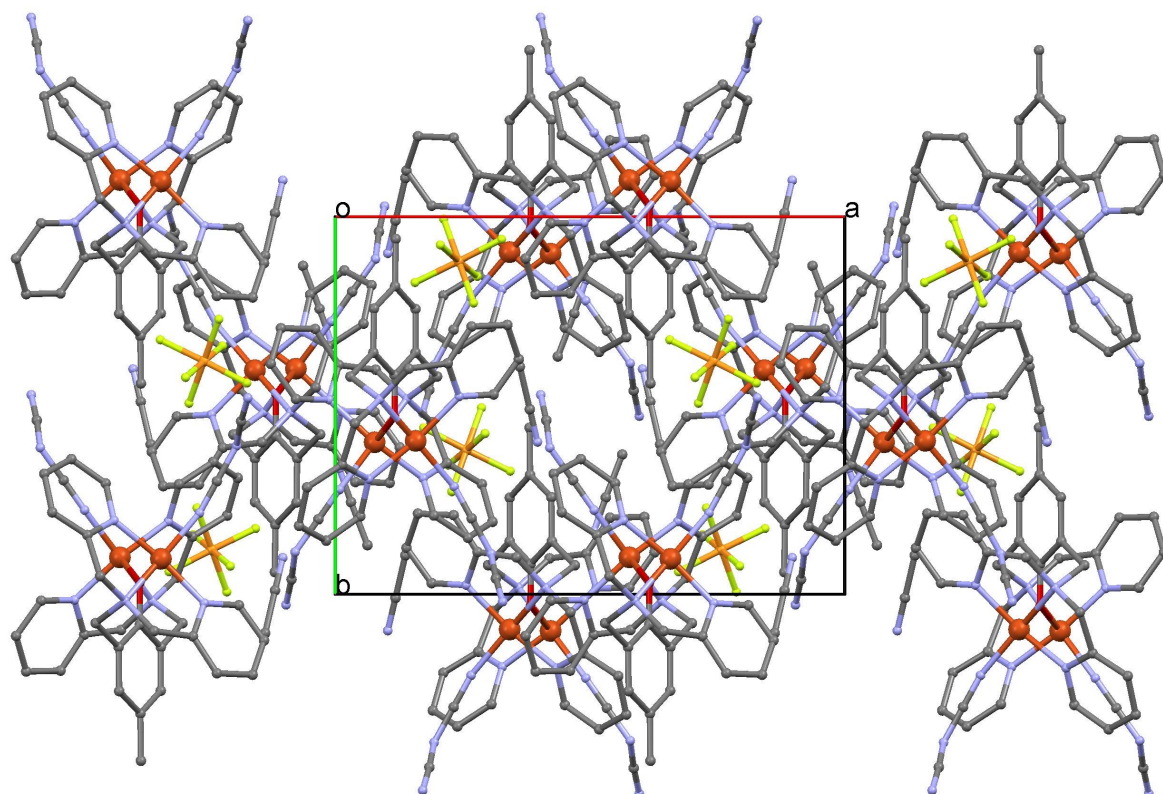

**Fig. S10:** Packing plot of  $5 \cdot 2\text{CH}_3\text{CN}$

**Table S1** Selected bond distances (Å) and angles (°) for **1**

|                  |            |                   |            |
|------------------|------------|-------------------|------------|
| Cu(1)-N(2)       | 1.998(4)   | Cu(1)-N(3)        | 2.205(5)   |
| Cu(1)-N(1)       | 2.044(2)   | Cu(1)-O(1)        | 1.959(3)   |
| Cu(1)-O(10)      | 1.932(4)   | Cu(2)-N(5)        | 1.988(5)   |
| Cu(2)-N(6)       | 2.026(5)   | Cu(2)-N(4)        | 2.041(4)   |
| Cu(2)-O(1)       | 2.200(4)   | Cu(2)-O(10)       | 1.932(3)   |
| N(1)-Cu(1)-O(10) | 168.05(19) | N(5)-Cu(2)-N(6)   | 162.48(17) |
| N(2)-Cu(1)-O(1)  | 159.0(2)   | N(4)-Cu(2)-O(10)  | 170.71(17) |
| O(1)-Cu(2)-O(1)  | 78.27(14)  | Cu(1)-O(10)-Cu(2) | 103.29(18) |
| Cu(1)-O(1)-Cu(2) | 93.36(15)  |                   |            |

**Table S2** Selected bond distances (Å) and angles (°) for **2**

|                  |            |                  |            |
|------------------|------------|------------------|------------|
| Cu(1)-N(2)       | 2.020(6)   | Cu(1)-N(3)       | 1.999(5)   |
| Cu(1)-N(1)       | 2.015(4)   | Cu(1)-O(1)       | 2.227(4)   |
| Cu(1)-N(7)       | 1.957(5)   | Cu(1)-O(2)       | 2.769(7)   |
| Cu(2)-N(6)       | 2.088(5)   | Cu(2)-N(4)       | 2.020(6)   |
| Cu(2)-O(1)       | 2.029(4)   | Cu(2)-N(8)       | 1.944(7)   |
| Cu(2)-N(5B)      | 1.997(10)  | Cu(2)-N(5A)      | 2.186(11)  |
| N(7)-N(8)        | 1.362(7)   |                  |            |
| N(1)-Cu(1)-N(7)  | 173.5(2)   | O(1)-Cu(1)-O(2)  | 167.87(17) |
| N(3)-Cu(1)-N(2)  | 161.09(19) | N(4)-Cu(2)-N(8)  | 174.1(2)   |
| O(1)-Cu(2)-N(5B) | 130.6(3)   | O(1)-Cu(2)-N(5A) | 127.4(3)   |
| Cu(1)-O(1)-Cu(2) | 108.85(18) |                  |            |

**Table S3.** Selected bond distances (Å) and angles (°) for **3**

|                  |            |                  |            |
|------------------|------------|------------------|------------|
| Cu(1)-N(2)       | 2.140(4)   | Cu(1)-N(3)       | 2.015(4)   |
| Cu(1)-N(1)       | 2.034(4)   | Cu(1)-O(1)       | 1.986(3)   |
| Cu(1)-O(10)      | 1.959(3)   | Cu(2)-N(5)       | 2.173(4)   |
| Cu(2)-N(6)       | 2.005(4)   | Cu(2)-N(4)       | 2.054(4)   |
| Cu(2)-O(1)       | 1.986(3)   | Cu(2)-O(11)      | 1.993(3)   |
| N(1)-Cu(1)-O(10) | 170.17(16) | O(1)-Cu(2)-N(6)  | 170.07(17) |
| N(3)-Cu(1)-O(1)  | 164.48(17) | N(4)-Cu(2)-O(11) | 160.56(16) |
| Cu(2)-O(11)-P(1) | 120.1(2)   | Cu(1)-O(10)-P(1) | 124.1(2)   |
| Cu(1)-O(1)-Cu(2) | 126.90(17) |                  |            |

**Table S4** Selected bond distances (Å) and angles (°) for 4·2CH<sub>3</sub>CN

|                   |            |                   |           |
|-------------------|------------|-------------------|-----------|
| Cu(1)-N(2)        | 1.980(5)   | Cu(1)-N(3)        | 1.972(5)  |
| Cu(1)-N(1)        | 2.058(6)   | Cu(1)-O(1)        | 2.190(5)  |
| Cu(1)-N(7)        | 1.972(6)   | Cu(2)-N(5)        | 1.993(5)  |
| Cu(2)-N(6)        | 2.000(5)   | Cu(2)-N(4)        | 2.046(5)  |
| Cu(2)-O(1)        | 2.190(5)   | Cu(2)-N(10)       | 1.961(5)  |
| N(7)-C(34)        | 1.160(8)   | N(8)-C(34)        | 1.288(9)  |
| N(9)-C(35)        | 1.165(11)  | N(8)-C(35)        | 1.342(11) |
| N(10)-C(36)       | 1.174(8)   | N(11)-C(36)       | 1.286(9)  |
| N(12)-C(37)       | 1.159(10)  | N(11)-C(37)       | 1.324(10) |
| N(1)-Cu(1)-N(7)   | 165.2(3)   | N(5)-Cu(2)-N(6)   | 161.3(3)  |
| N(3)-Cu(1)-N(2)   | 162.1(3)   | N(4)-Cu(2)-N(10)  | 165.2(3)  |
| Cu(1)-N(7)-C(34)  | 161.0(6)   | Cu(2)-N(10)-C(36) | 162.1(6)  |
| N(7)-C(34)-N(8)   | 175.0(9)   | N(10)-C(36)-N(11) | 172.0(8)  |
| N(8)-C(35)-N(9)   | 173.8(8)   | N(12)-C(37)-N(11) | 174.2(7)  |
| C(36)-N(11)-C(37) | 117.8(7)   | C(34)-N(8)-C(35)  | 119.8(7)  |
| Cu(1)-O(1)-Cu(2)  | 136.82(17) |                   |           |

**Table S5** Selected bond distances (Å) and angles (°) for 5·2CH<sub>3</sub>CN

|                   |            |                   |            |
|-------------------|------------|-------------------|------------|
| Cu(1)-N(2)        | 1.989(2)   | Cu(1)-N(3)        | 1.999(2)   |
| Cu(1)-N(1)        | 2.045(2)   | Cu(1)-O(1)        | 2.170(2)   |
| Cu(1)-N(7)        | 1.962(3)   | Cu(2)-N(5)        | 1.983(2)   |
| Cu(2)-N(6)        | 1.982(2)   | Cu(2)-N(4)        | 2.046(2)   |
| Cu(2)-O(1)        | 2.172(2)   | Cu(2)-N(10)       | 1.979(3)   |
| N(7)-C(34)        | 1.161(4)   | N(8)-C(34)        | 1.320(4)   |
| N(9)-C(35)        | 1.142(4)   | N(8)-C(35)        | 1.320(4)   |
| N(10)-C(36)       | 1.153(4)   | N(11)-C(36)       | 1.292(4)   |
| N(12)-C(37)       | 1.154(4)   | N(11)-C(37)       | 1.335(4)   |
| N(1)-Cu(1)-N(7)   | 164.33(10) | N(5)-Cu(2)-N(6)   | 161.79(10) |
| N(3)-Cu(1)-N(2)   | 161.29(10) | N(4)-Cu(2)-N(10)  | 164.32(10) |
| Cu(1)-N(7)-C(34)  | 164.7(3)   | Cu(2)-N(10)-C(36) | 160.8(3)   |
| N(7)-C(34)-N(8)   | 173.5(3)   | N(10)-C(36)-N(11) | 174.4(4)   |
| N(8)-C(35)-N(9)   | 174.0(3)   | N(12)-C(37)-N(11) | 174.1(4)   |
| C(36)-N(11)-C(37) | 119.9(3)   | C(34)-N(8)-C(35)  | 118.5(3)   |
| Cu(1)-O(1)-Cu(2)  | 137.65(8)  |                   |            |
